# Supplementary material
Source: HighWire-hosted journal article supplement (https://oem.bmj.com/content/oemed-2022-108555)
Supplement: inline-supplementary-material-1 [file inline-supplementary-material-1.pdf]

## SUPPLEMENTARY MATERIALS

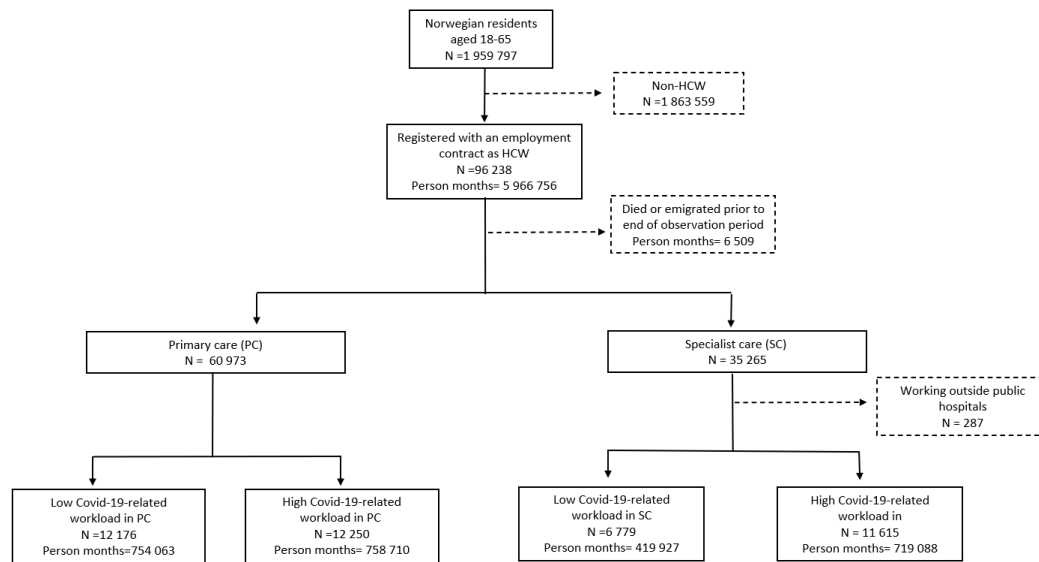

**Figure A1** Flowchart of sample used in the analysis.

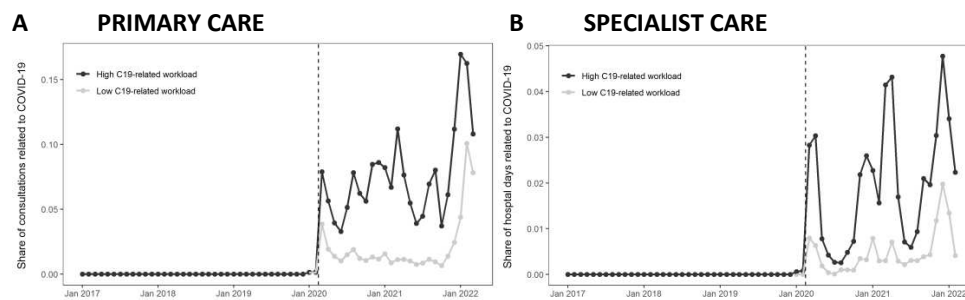

**Figure A2** The COVID-19 related workload (consultations/hospital days) over time for 1<sup>st</sup> and 5<sup>th</sup> quintile of the COVID-19 related workload, in primary (A) and specialist (B) care.

**Table A1** Descriptive statistics for workers in low and high C19-related workload areas in primary and specialist care

|                            | Primary care             |        |                           |        | Specialist care          |        |                           |        |
|----------------------------|--------------------------|--------|---------------------------|--------|--------------------------|--------|---------------------------|--------|
|                            | Low C19-related workload |        | High C19-related workload |        | Low C19-related workload |        | High C19-related workload |        |
|                            | Mean/<br>share           | sd     | Mean/<br>share            | sd     | Mean/<br>share           | sd     | Mean/<br>share            | sd     |
| Age                        | 42.4                     | (7.69) | 42                        | (7.56) | 41.3                     | (7.46) | 40.9                      | (7.38) |
| Women                      | 88 %                     | (32.8) | 83 %                      | (37.2) | 81 %                     | (39.6) | 78 %                      | (41.5) |
| Immigrants                 | 23 %                     | (42.2) | 51 %                      | (50.0) | 12 %                     | (32.8) | 23 %                      | (42.3) |
| <b>Occupational groups</b> |                          |        |                           |        |                          |        |                           |        |
| Physicians                 | 6 %                      | (24.4) | 5 %                       | (22.2) | 24 %                     | (42.9) | 27 %                      | (44.6) |
| Nurses                     | 31 %                     | (46.2) | 29 %                      | (45.5) | 68 %                     | (46.8) | 63 %                      | (48.3) |
| Health professionals       | 41 %                     | (49.1) | 46 %                      | (49.9) | 4 %                      | (20.3) | 5 %                       | (21.5) |
| Personal care workers      | 22 %                     | (41.5) | 19 %                      | (39.3) | 4 %                      | (19.5) | 5 %                       | (21.2) |
| N                          | 12 176                   |        | 12 250                    |        | 6 779                    |        | 11 615                    |        |

**Table A2** Average monthly sick leave rates in primary and specialist care, prior to ("Pre", 2017 to February 2020), and after the onset of the pandemic, i.e. ("Post", March 2020-February 2022). Standard errors clustered on the level of individual in parentheses.

|                 | All-cause sick leave        |                               | Not COVID-19 related sick leave |                                |
|-----------------|-----------------------------|-------------------------------|---------------------------------|--------------------------------|
|                 | Pre                         | Post                          | Pre                             | Post                           |
| Primary care    | 10.3<br>[95% CI: 10.2,10.4] | 13.1<br>[95% CI: 12.98,13.22] | 10.29<br>[95% CI: 10.19,10.39]  | 11.46<br>[95% CI: 11.34,11.58] |
| Specialist care | 7.45<br>[95% CI: 7.33,7.57] | 9.66<br>[95% CI: 9.52,9.8]    | 7.44<br>[95% CI: 7.32,7.56]     | 8.09<br>[95% CI: 7.95,8.23]    |

**Table A3** Average monthly all-cause sick leave rates (A) and sick leave not related to COVID-19 infections (B) in primary and specialist care. Standard errors clustered on the level of individual in parentheses.

| <b>A</b>     |                 | <b>All-cause sick leave</b> |             |             |             |
|--------------|-----------------|-----------------------------|-------------|-------------|-------------|
| <b>Month</b> | <b>Type</b>     | <b>2017-2019</b>            | <b>2020</b> | <b>2021</b> | <b>2022</b> |
| 1            | Primary care    | 12.54(0.09)                 | 11.96(0.13) | 13.99(0.14) | 22.48(0.17) |
| 2            | Primary care    | 11.09(0.08)                 | 11.78(0.13) | 12.91(0.14) | 22.91(0.17) |
| 3            | Primary care    | 10.4(0.08)                  | 17.44(0.15) | 14.36(0.14) | NA          |
| 4            | Primary care    | 10.56(0.08)                 | 10.18(0.12) | 12.67(0.13) | NA          |
| 5            | Primary care    | 10.01(0.08)                 | 10.51(0.12) | 13.32(0.14) | NA          |
| 6            | Primary care    | 9.28(0.07)                  | 11.43(0.13) | 10.81(0.13) | NA          |
| 7            | Primary care    | 7.89(0.07)                  | 7.69(0.11)  | 7.55(0.11)  | NA          |
| 8            | Primary care    | 8.71(0.07)                  | 11.56(0.13) | 12.26(0.13) | NA          |
| 9            | Primary care    | 10.09(0.08)                 | 10.81(0.13) | 12.16(0.13) | NA          |
| 10           | Primary care    | 10.88(0.08)                 | 11.79(0.13) | 12.47(0.13) | NA          |
| 11           | Primary care    | 10.5(0.08)                  | 14.4(0.14)  | 16.78(0.15) | NA          |
| 12           | Primary care    | 10.63(0.08)                 | 10.8(0.13)  | 13.08(0.14) | NA          |
| 1            | Specialist care | 9.11(0.1)                   | 8.98(0.15)  | 9.57(0.16)  | 19.71(0.21) |
| 2            | Specialist care | 8.24(0.09)                  | 8.72(0.15)  | 8.86(0.15)  | 21.45(0.22) |
| 3            | Specialist care | 7.66(0.09)                  | 12.72(0.18) | 9.99(0.16)  | NA          |
| 4            | Specialist care | 7.76(0.09)                  | 6.8(0.13)   | 9.03(0.15)  | NA          |
| 5            | Specialist care | 7.15(0.09)                  | 7.21(0.14)  | 9.68(0.16)  | NA          |
| 6            | Specialist care | 6.73(0.08)                  | 7.48(0.14)  | 7.52(0.14)  | NA          |
| 7            | Specialist care | 5.37(0.07)                  | 4.77(0.11)  | 5.1(0.12)   | NA          |
| 8            | Specialist care | 6.07(0.08)                  | 8.1(0.15)   | 8.66(0.15)  | NA          |
| 9            | Specialist care | 7.27(0.09)                  | 7.55(0.14)  | 9.15(0.15)  | NA          |
| 10           | Specialist care | 7.83(0.09)                  | 8.29(0.15)  | 9.55(0.16)  | NA          |
| 11           | Specialist care | 7.76(0.09)                  | 10.36(0.16) | 13.32(0.18) | NA          |
| 12           | Specialist care | 7.5(0.09)                   | 7.09(0.14)  | 10.06(0.16) | NA          |

  

| <b>B</b>     |                 | <b>Sick leave not related to COVID-19 infection</b> |             |             |             |
|--------------|-----------------|-----------------------------------------------------|-------------|-------------|-------------|
| <b>Month</b> | <b>Type</b>     | <b>2017-2019</b>                                    | <b>2020</b> | <b>2021</b> | <b>2022</b> |
| 1            | Primary care    | 12.53(0.09)                                         | 11.95(0.13) | 12.81(0.14) | 13.59(0.14) |
| 2            | Primary care    | 11.08(0.08)                                         | 11.77(0.13) | 12.18(0.13) | 10.85(0.13) |
| 3            | Primary care    | 10.38(0.08)                                         | 15.35(0.15) | 13.28(0.14) | NA          |
| 4            | Primary care    | 10.54(0.08)                                         | 9.5(0.12)   | 11.88(0.13) | NA          |
| 5            | Primary care    | 10(0.08)                                            | 10.15(0.12) | 12.84(0.14) | NA          |
| 6            | Primary care    | 9.26(0.07)                                          | 11.19(0.13) | 10.58(0.12) | NA          |
| 7            | Primary care    | 7.88(0.07)                                          | 7.5(0.11)   | 7.31(0.11)  | NA          |
| 8            | Primary care    | 8.7(0.07)                                           | 11.16(0.13) | 11.53(0.13) | NA          |
| 9            | Primary care    | 10.08(0.08)                                         | 10.42(0.12) | 11.44(0.13) | NA          |
| 10           | Primary care    | 10.86(0.08)                                         | 11.29(0.13) | 11.75(0.13) | NA          |
| 11           | Primary care    | 10.49(0.08)                                         | 13.2(0.14)  | 14.71(0.14) | NA          |
| 12           | Primary care    | 10.61(0.08)                                         | 9.82(0.12)  | 10.7(0.13)  | NA          |
| 1            | Specialist care | 9.11(0.1)                                           | 8.97(0.15)  | 8.75(0.15)  | 10.09(0.16) |
| 2            | Specialist care | 8.23(0.09)                                          | 8.71(0.15)  | 8.37(0.15)  | 8.45(0.15)  |
| 3            | Specialist care | 7.65(0.09)                                          | 10.91(0.17) | 9.27(0.16)  | NA          |
| 4            | Specialist care | 7.75(0.09)                                          | 6.26(0.13)  | 8.56(0.15)  | NA          |
| 5            | Specialist care | 7.14(0.09)                                          | 6.93(0.14)  | 9.36(0.16)  | NA          |
| 6            | Specialist care | 6.72(0.08)                                          | 7.28(0.14)  | 7.35(0.14)  | NA          |
| 7            | Specialist care | 5.36(0.07)                                          | 4.63(0.11)  | 4.94(0.12)  | NA          |
| 8            | Specialist care | 6.06(0.08)                                          | 7.8(0.14)   | 8.15(0.15)  | NA          |
| 9            | Specialist care | 7.26(0.09)                                          | 7.16(0.14)  | 8.49(0.15)  | NA          |
| 10           | Specialist care | 7.82(0.09)                                          | 7.82(0.14)  | 8.93(0.15)  | NA          |
| 11           | Specialist care | 7.75(0.09)                                          | 9.47(0.16)  | 11.12(0.17) | NA          |
| 12           | Specialist care | 7.5(0.09)                                           | 6.44(0.13)  | 7.76(0.14)  | NA          |

**Table A4** Average all-cause sick leave rates in primary and specialist care for low and high COVID-19 related workload. Standard errors clustered on the level of individual in parentheses.

| Year      | Month | Primary care           |                           |            | Specialist care          |                           |             |
|-----------|-------|------------------------|---------------------------|------------|--------------------------|---------------------------|-------------|
|           |       | Low C19-related burden | High C19-related workload | Difference | Low C19-related workload | High C19-related workload | Difference  |
| 2017-2019 | 1     | 11.25(0.18)            | 12.82(0.19)               | 1.57(0.27) | 8.81(0.22)               | 9.68(0.18)                | 0.87(0.28)  |
| 2017-2019 | 2     | 10.27(0.17)            | 11.04(0.18)               | 0.77(0.25) | 8.08(0.21)               | 8.57(0.16)                | 0.48(0.27)  |
| 2017-2019 | 3     | 9.61(0.17)             | 10.29(0.17)               | 0.68(0.27) | 7.4(0.2)                 | 8.02(0.16)                | 0.62(0.29)  |
| 2017-2019 | 4     | 9.69(0.17)             | 10.23(0.17)               | 0.54(0.28) | 7.48(0.2)                | 8.01(0.16)                | 0.52(0.29)  |
| 2017-2019 | 5     | 9.32(0.16)             | 9.7(0.17)                 | 0.38(0.28) | 7.21(0.2)                | 7.34(0.15)                | 0.13(0.3)   |
| 2017-2019 | 6     | 8.67(0.16)             | 9.21(0.16)                | 0.54(0.28) | 6.37(0.18)               | 7.17(0.15)                | 0.8(0.3)    |
| 2017-2019 | 7     | 7.27(0.14)             | 8.52(0.16)                | 1.25(0.29) | 5.15(0.16)               | 5.62(0.13)                | 0.48(0.3)   |
| 2017-2019 | 8     | 7.99(0.15)             | 9.04(0.16)                | 1.05(0.29) | 5.95(0.18)               | 6.43(0.14)                | 0.48(0.3)   |
| 2017-2019 | 9     | 9.15(0.16)             | 10.3(0.17)                | 1.15(0.29) | 6.82(0.19)               | 7.75(0.16)                | 0.93(0.31)  |
| 2017-2019 | 10    | 9.89(0.17)             | 11.3(0.18)                | 1.41(0.29) | 7.54(0.2)                | 8.29(0.16)                | 0.75(0.31)  |
| 2017-2019 | 11    | 9.52(0.17)             | 10.85(0.18)               | 1.33(0.28) | 7.6(0.21)                | 8.33(0.16)                | 0.73(0.31)  |
| 2017-2019 | 12    | 9.81(0.17)             | 10.9(0.18)                | 1.08(0.28) | 7.29(0.2)                | 7.97(0.16)                | 0.68(0.29)  |
| 2020      | 1     | 11.44(0.29)            | 12.33(0.3)                | 0.89(0.46) | 8.56(0.34)               | 9.53(0.27)                | 0.97(0.48)  |
| 2020      | 2     | 11.12(0.28)            | 11.6(0.29)                | 0.48(0.45) | 8.54(0.34)               | 9.12(0.27)                | 0.58(0.48)  |
| 2020      | 3     | 14.8(0.32)             | 18.95(0.35)               | 4.15(0.51) | 11.66(0.39)              | 14.86(0.33)               | 3.21(0.55)  |
| 2020      | 4     | 9.07(0.26)             | 11.21(0.29)               | 2.13(0.44) | 6.39(0.3)                | 6.92(0.24)                | 0.53(0.45)  |
| 2020      | 5     | 9.95(0.27)             | 10.76(0.28)               | 0.81(0.44) | 7.1(0.31)                | 7.28(0.24)                | 0.18(0.45)  |
| 2020      | 6     | 10.45(0.28)            | 12.29(0.3)                | 1.84(0.45) | 7(0.31)                  | 7.73(0.25)                | 0.73(0.46)  |
| 2020      | 7     | 7.22(0.23)             | 8.39(0.25)                | 1.17(0.41) | 4.96(0.26)               | 4.74(0.2)                 | -0.22(0.41) |
| 2020      | 8     | 10.4(0.28)             | 11.82(0.29)               | 1.42(0.45) | 7.94(0.33)               | 8.53(0.26)                | 0.58(0.47)  |
| 2020      | 9     | 9.72(0.27)             | 10.9(0.28)                | 1.19(0.44) | 7.66(0.32)               | 7.49(0.24)                | -0.17(0.46) |
| 2020      | 10    | 10.92(0.28)            | 12.06(0.29)               | 1.14(0.46) | 7.74(0.32)               | 8.86(0.26)                | 1.12(0.47)  |
| 2020      | 11    | 13.27(0.31)            | 14.85(0.32)               | 1.58(0.49) | 9.75(0.36)               | 10.87(0.29)               | 1.12(0.51)  |
| 2020      | 12    | 9.57(0.27)             | 10.97(0.28)               | 1.4(0.44)  | 6.93(0.31)               | 7.32(0.24)                | 0.39(0.46)  |
| 2021      | 1     | 12.75(0.3)             | 14.54(0.32)               | 1.79(0.48) | 9.34(0.35)               | 10.29(0.28)               | 0.95(0.5)   |
| 2021      | 2     | 12.27(0.3)             | 13.45(0.31)               | 1.18(0.47) | 8.26(0.33)               | 9.1(0.27)                 | 0.84(0.48)  |
| 2021      | 3     | 12.9(0.3)              | 15.58(0.33)               | 2.68(0.49) | 9.24(0.35)               | 10.83(0.29)               | 1.59(0.5)   |
| 2021      | 4     | 12.36(0.3)             | 12.89(0.3)                | 0.53(0.47) | 9.12(0.35)               | 9.05(0.27)                | -0.07(0.49) |
| 2021      | 5     | 12.92(0.3)             | 13.55(0.31)               | 0.63(0.48) | 9.41(0.36)               | 9.64(0.27)                | 0.23(0.49)  |
| 2021      | 6     | 10.33(0.28)            | 11.5(0.29)                | 1.17(0.45) | 6.73(0.3)                | 8.08(0.25)                | 1.35(0.46)  |
| 2021      | 7     | 7.45(0.24)             | 7.77(0.24)                | 0.31(0.41) | 4.99(0.26)               | 4.99(0.2)                 | 0(0.42)     |
| 2021      | 8     | 10.76(0.28)            | 13.12(0.31)               | 2.36(0.47) | 8.5(0.34)                | 8.98(0.27)                | 0.48(0.48)  |
| 2021      | 9     | 10.79(0.28)            | 13.27(0.31)               | 2.48(0.47) | 8.63(0.34)               | 10.15(0.28)               | 1.51(0.5)   |
| 2021      | 10    | 11.6(0.29)             | 13.14(0.31)               | 1.55(0.47) | 9.11(0.35)               | 10.26(0.28)               | 1.15(0.5)   |
| 2021      | 11    | 14.69(0.32)            | 17.69(0.35)               | 3(0.51)    | 13.19(0.41)              | 14.45(0.33)               | 1.26(0.56)  |
| 2021      | 12    | 11.24(0.29)            | 14.72(0.32)               | 3.48(0.48) | 9.11(0.35)               | 11.23(0.29)               | 2.12(0.51)  |
| 2022      | 1     | 18.1(0.35)             | 26.65(0.4)                | 8.55(0.57) | 18.57(0.47)              | 23.73(0.4)                | 5.16(0.65)  |
| 2022      | 2     | 20.59(0.37)            | 22.49(0.38)               | 1.9(0.57)  | 20.3(0.49)               | 21.55(0.38)               | 1.25(0.65)  |

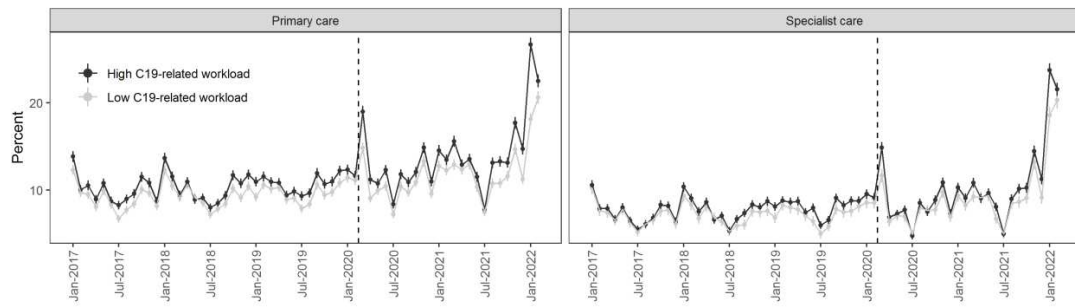

**Figure A3** Monthly all-cause sick leave rates from 2017 to Feb 2022 for HCWs in health facilities with high and low COVID-19 related workload in primary and specialist care.

**Table A4** Average not COVID-19 related sick leave rates in primary and specialist care for low(Q1) and high(Q5) levels of the COVID-19 related workload. Standard errors clustered on the level of individual in parentheses.

| Year      | Month | Primary care             |                           |             | Specialist care          |                           |             |
|-----------|-------|--------------------------|---------------------------|-------------|--------------------------|---------------------------|-------------|
|           |       | Low C19-related workload | High C19-related workload | Difference  | Low C19-related workload | High C19-related workload | Difference  |
| 2017-2019 | 1     | 11.24(0.18)              | 12.81(0.19)               | 1.56(0.27)  | 8.8(0.22)                | 9.68(0.18)                | 0.88(0.28)  |
| 2017-2019 | 2     | 10.26(0.17)              | 11.03(0.18)               | 0.77(0.25)  | 8.07(0.21)               | 8.56(0.16)                | 0.48(0.27)  |
| 2017-2019 | 3     | 9.61(0.17)               | 10.27(0.17)               | 0.67(0.27)  | 7.39(0.2)                | 8.01(0.16)                | 0.62(0.29)  |
| 2017-2019 | 4     | 9.68(0.17)               | 10.21(0.17)               | 0.53(0.28)  | 7.46(0.2)                | 8(0.16)                   | 0.54(0.29)  |
| 2017-2019 | 5     | 9.31(0.16)               | 9.69(0.17)                | 0.38(0.28)  | 7.21(0.2)                | 7.34(0.15)                | 0.13(0.3)   |
| 2017-2019 | 6     | 8.65(0.16)               | 9.2(0.16)                 | 0.55(0.28)  | 6.37(0.18)               | 7.17(0.15)                | 0.8(0.3)    |
| 2017-2019 | 7     | 7.26(0.14)               | 8.52(0.16)                | 1.26(0.29)  | 5.15(0.16)               | 5.62(0.13)                | 0.47(0.3)   |
| 2017-2019 | 8     | 7.98(0.15)               | 9.03(0.16)                | 1.05(0.28)  | 5.95(0.18)               | 6.42(0.14)                | 0.47(0.3)   |
| 2017-2019 | 9     | 9.14(0.16)               | 10.28(0.17)               | 1.14(0.29)  | 6.82(0.19)               | 7.74(0.16)                | 0.93(0.31)  |
| 2017-2019 | 10    | 9.87(0.17)               | 11.26(0.18)               | 1.39(0.29)  | 7.54(0.2)                | 8.29(0.16)                | 0.75(0.31)  |
| 2017-2019 | 11    | 9.51(0.17)               | 10.84(0.18)               | 1.33(0.28)  | 7.59(0.21)               | 8.32(0.16)                | 0.73(0.31)  |
| 2017-2019 | 12    | 9.8(0.17)                | 10.88(0.18)               | 1.08(0.28)  | 7.28(0.2)                | 7.96(0.16)                | 0.68(0.29)  |
| 2020      | 1     | 11.43(0.29)              | 12.32(0.3)                | 0.89(0.46)  | 8.54(0.34)               | 9.52(0.27)                | 0.98(0.48)  |
| 2020      | 2     | 11.11(0.28)              | 11.58(0.29)               | 0.47(0.45)  | 8.53(0.34)               | 9.09(0.27)                | 0.57(0.48)  |
| 2020      | 3     | 13.63(0.31)              | 15.92(0.33)               | 2.3(0.49)   | 10.64(0.37)              | 12.04(0.3)                | 1.4(0.52)   |
| 2020      | 4     | 8.87(0.26)               | 9.81(0.27)                | 0.94(0.43)  | 6.12(0.29)               | 6.06(0.22)                | -0.06(0.44) |
| 2020      | 5     | 9.89(0.27)               | 10.05(0.27)               | 0.17(0.44)  | 6.96(0.31)               | 6.87(0.23)                | -0.09(0.45) |
| 2020      | 6     | 10.36(0.28)              | 11.77(0.29)               | 1.41(0.45)  | 6.85(0.31)               | 7.37(0.24)                | 0.53(0.45)  |
| 2020      | 7     | 7.14(0.23)               | 8.1(0.25)                 | 0.96(0.41)  | 4.87(0.26)               | 4.51(0.19)                | -0.36(0.41) |
| 2020      | 8     | 10.17(0.27)              | 11.29(0.29)               | 1.12(0.45)  | 7.83(0.33)               | 8.09(0.25)                | 0.26(0.47)  |
| 2020      | 9     | 9.59(0.27)               | 10.26(0.27)               | 0.67(0.44)  | 7.34(0.32)               | 6.99(0.24)                | -0.35(0.45) |
| 2020      | 10    | 10.71(0.28)              | 11.37(0.29)               | 0.67(0.45)  | 7.53(0.32)               | 8.14(0.25)                | 0.61(0.46)  |
| 2020      | 11    | 12.93(0.3)               | 12.94(0.3)                | 0.02(0.47)  | 9.37(0.35)               | 9.52(0.27)                | 0.15(0.5)   |
| 2020      | 12    | 9.17(0.26)               | 9.6(0.27)                 | 0.43(0.43)  | 6.59(0.3)                | 6.53(0.23)                | -0.06(0.44) |
| 2021      | 1     | 12.34(0.3)               | 12.5(0.3)                 | 0.16(0.47)  | 8.66(0.34)               | 9.01(0.27)                | 0.35(0.48)  |
| 2021      | 2     | 12.06(0.3)               | 12.02(0.29)               | -0.04(0.46) | 8.08(0.33)               | 8.36(0.26)                | 0.28(0.47)  |
| 2021      | 3     | 12.53(0.3)               | 13.39(0.31)               | 0.86(0.47)  | 9.12(0.35)               | 9.44(0.27)                | 0.32(0.49)  |
| 2021      | 4     | 11.92(0.29)              | 11.65(0.29)               | -0.27(0.46) | 8.93(0.35)               | 8.21(0.26)                | -0.72(0.48) |
| 2021      | 5     | 12.66(0.3)               | 12.89(0.3)                | 0.24(0.47)  | 9.25(0.35)               | 9.18(0.27)                | -0.06(0.49) |
| 2021      | 6     | 10.16(0.27)              | 11.28(0.29)               | 1.12(0.45)  | 6.66(0.3)                | 7.83(0.25)                | 1.17(0.45)  |
| 2021      | 7     | 7.32(0.24)               | 7.54(0.24)                | 0.21(0.41)  | 4.91(0.26)               | 4.76(0.2)                 | -0.16(0.41) |
| 2021      | 8     | 10.44(0.28)              | 12.09(0.3)                | 1.65(0.46)  | 8.19(0.33)               | 8.25(0.26)                | 0.06(0.47)  |
| 2021      | 9     | 10.42(0.28)              | 12.12(0.3)                | 1.7(0.46)   | 8.2(0.33)                | 8.96(0.27)                | 0.76(0.48)  |
| 2021      | 10    | 11.13(0.29)              | 12.02(0.29)               | 0.89(0.46)  | 8.71(0.34)               | 9.32(0.27)                | 0.61(0.49)  |
| 2021      | 11    | 13.3(0.31)               | 14.77(0.32)               | 1.47(0.49)  | 11.51(0.39)              | 11.39(0.3)                | -0.13(0.53) |
| 2021      | 12    | 9.83(0.27)               | 11.29(0.29)               | 1.46(0.45)  | 7.53(0.32)               | 7.84(0.25)                | 0.32(0.46)  |
| 2022      | 1     | 13.1(0.31)               | 14.1(0.32)                | 1.01(0.49)  | 9.81(0.36)               | 10.67(0.29)               | 0.86(0.51)  |
| 2022      | 2     | 10.35(0.28)              | 11.14(0.29)               | 0.79(0.45)  | 8.5(0.34)                | 8.65(0.26)                | 0.15(0.49)  |

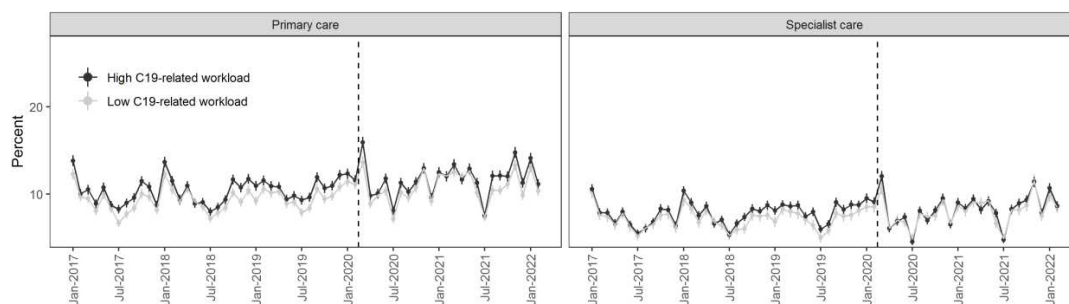

**Figure A4** Monthly non-COVID-19 related sick leave rates from 2017 to Feb 2022 for HCWs in health facilities with high and low COVID-19 related workload in primary and specialist care.

**Table A5** Average COVID-19 related sick leave rates in primary and specialist care for low(Q1) and high(Q5) levels of the COVID-19 related workload. Standard errors clustered on the level of individual in parentheses.

| Year | Month | Primary care             |                           |            | Specialist care          |                           |            |
|------|-------|--------------------------|---------------------------|------------|--------------------------|---------------------------|------------|
|      |       | Low C19-related workload | High C19-related workload | Difference | Low C19-related workload | High C19-related workload | Difference |
| 2020 | 3     | 1.17(0.1)                | 3.03(0.15)                | 1.85(0.18) | 1.02(0.12)               | 2.82(0.15)                | 1.81(0.2)  |
| 2020 | 4     | 0.21(0.04)               | 1.4(0.11)                 | 1.19(0.19) | 0.27(0.06)               | 0.85(0.09)                | 0.59(0.21) |
| 2020 | 5     | 0.07(0.02)               | 0.71(0.08)                | 0.64(0.19) | 0.13(0.04)               | 0.4(0.06)                 | 0.27(0.2)  |
| 2020 | 6     | 0.09(0.03)               | 0.51(0.06)                | 0.42(0.19) | 0.15(0.05)               | 0.35(0.06)                | 0.21(0.21) |
| 2020 | 7     | 0.08(0.03)               | 0.29(0.05)                | 0.21(0.19) | 0.09(0.04)               | 0.22(0.04)                | 0.14(0.2)  |
| 2020 | 8     | 0.23(0.04)               | 0.53(0.07)                | 0.3(0.2)   | 0.12(0.04)               | 0.44(0.06)                | 0.32(0.21) |
| 2020 | 9     | 0.12(0.03)               | 0.65(0.07)                | 0.52(0.2)  | 0.32(0.07)               | 0.51(0.07)                | 0.18(0.22) |
| 2020 | 10    | 0.21(0.04)               | 0.69(0.07)                | 0.47(0.2)  | 0.21(0.06)               | 0.72(0.08)                | 0.51(0.22) |
| 2020 | 11    | 0.35(0.05)               | 1.91(0.12)                | 1.56(0.23) | 0.38(0.08)               | 1.35(0.11)                | 0.97(0.23) |
| 2020 | 12    | 0.4(0.06)                | 1.37(0.1)                 | 0.97(0.22) | 0.34(0.07)               | 0.79(0.08)                | 0.45(0.22) |
| 2021 | 1     | 0.41(0.06)               | 2.04(0.13)                | 1.63(0.23) | 0.68(0.1)                | 1.28(0.1)                 | 0.6(0.24)  |
| 2021 | 2     | 0.21(0.04)               | 1.43(0.11)                | 1.22(0.22) | 0.18(0.05)               | 0.73(0.08)                | 0.56(0.22) |
| 2021 | 3     | 0.37(0.06)               | 2.19(0.13)                | 1.82(0.23) | 0.12(0.04)               | 1.39(0.11)                | 1.27(0.23) |
| 2021 | 4     | 0.44(0.06)               | 1.24(0.1)                 | 0.81(0.22) | 0.19(0.05)               | 0.84(0.08)                | 0.65(0.22) |
| 2021 | 5     | 0.26(0.05)               | 0.65(0.07)                | 0.39(0.2)  | 0.16(0.05)               | 0.46(0.06)                | 0.3(0.21)  |
| 2021 | 6     | 0.17(0.04)               | 0.22(0.04)                | 0.05(0.19) | 0.07(0.03)               | 0.25(0.05)                | 0.18(0.2)  |
| 2021 | 7     | 0.13(0.03)               | 0.23(0.04)                | 0.1(0.19)  | 0.07(0.03)               | 0.23(0.04)                | 0.16(0.2)  |
| 2021 | 8     | 0.32(0.05)               | 1.03(0.09)                | 0.71(0.21) | 0.31(0.07)               | 0.73(0.08)                | 0.42(0.22) |
| 2021 | 9     | 0.37(0.06)               | 1.16(0.1)                 | 0.78(0.21) | 0.43(0.08)               | 1.19(0.1)                 | 0.76(0.23) |
| 2021 | 10    | 0.47(0.06)               | 1.12(0.1)                 | 0.65(0.22) | 0.4(0.08)                | 0.94(0.09)                | 0.54(0.23) |
| 2021 | 11    | 1.39(0.11)               | 2.92(0.15)                | 1.53(0.26) | 1.67(0.16)               | 3.06(0.16)                | 1.39(0.3)  |
| 2021 | 12    | 1.4(0.11)                | 3.42(0.16)                | 2.02(0.27) | 1.59(0.15)               | 3.39(0.17)                | 1.81(0.3)  |
| 2022 | 1     | 5(0.2)                   | 12.55(0.3)                | 7.55(0.4)  | 8.76(0.34)               | 13.06(0.31)               | 4.3(0.51)  |
| 2022 | 2     | 10.25(0.28)              | 11.35(0.29)               | 1.11(0.44) | 11.79(0.39)              | 12.9(0.31)                | 1.1(0.54)  |

## (i) Median split

**A**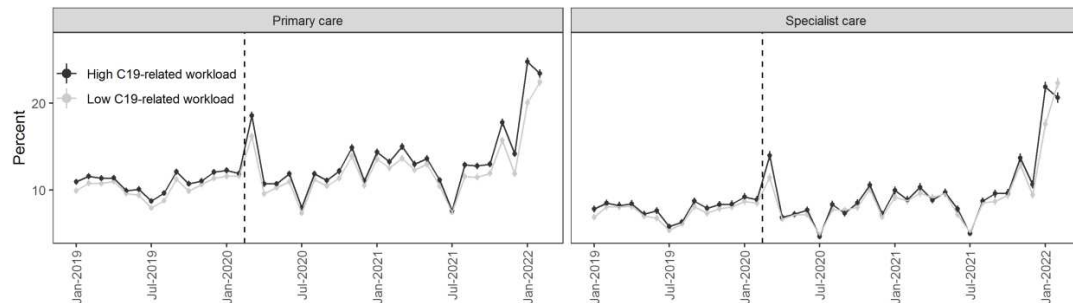**B**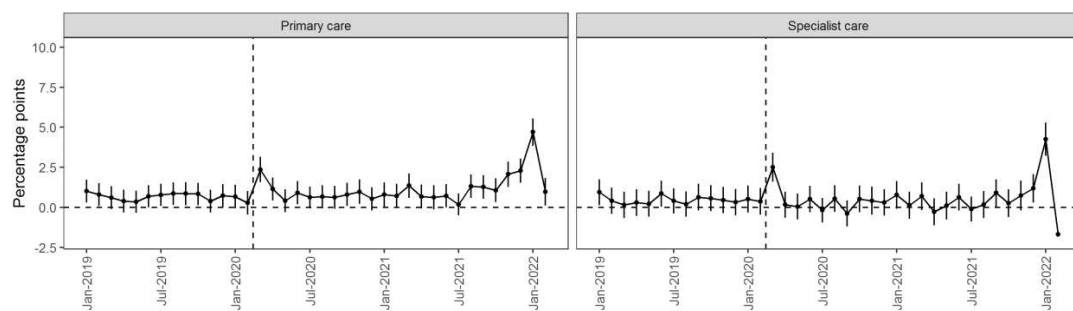

**Figure A5** Monthly COVID-19 related sick leave rates in primary and specialist care. Panel A shows monthly rates of COVID-19 related sick leave from 2019 to Feb 2022, for HCWs in health facilities with high and low COVID-19 related workload with a median split. Panels B shows the difference between them.



## (ii) Tertiles

## A

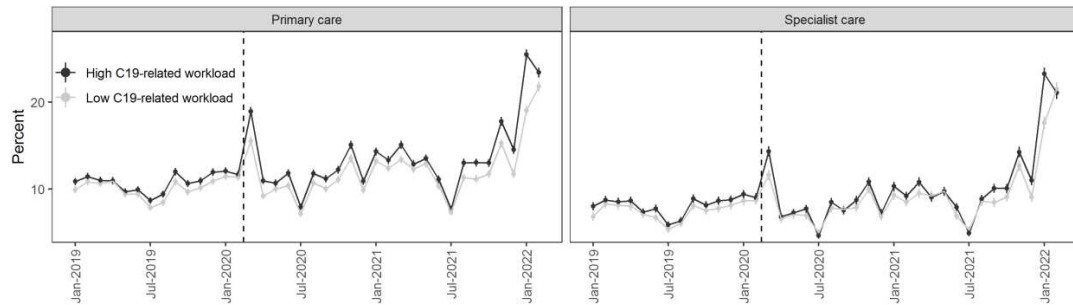

## B

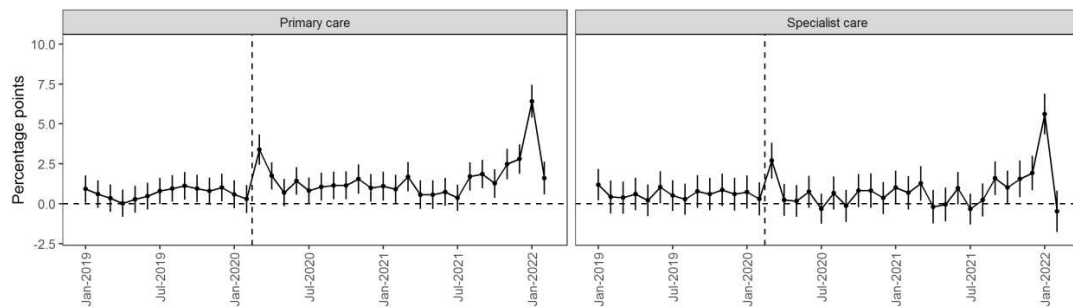

**Figure A6** Monthly COVID-19 related sick leave rates in primary and specialist care. Panel A shows monthly rates of COVID-19 related sick leave from 2019 to Feb 2022, for HCWs in health facilities with high and low COVID-19 related workload (1<sup>st</sup> and 3<sup>rd</sup> tertile). Panels B shows the difference between them.
